# Supplementary material for: Sensory over-responsivity: parent report, direct assessment measures, and neural architecture
Source: PubMed Central journal article supplement (PMC6360663; doi:10.1186/s13229-019-0255-7), 2019-02-04
Supplement: 13229_2019_255_MOESM2_ESM.pdf [file 13229_2019_255_MOESM2_ESM.pdf]

2a.

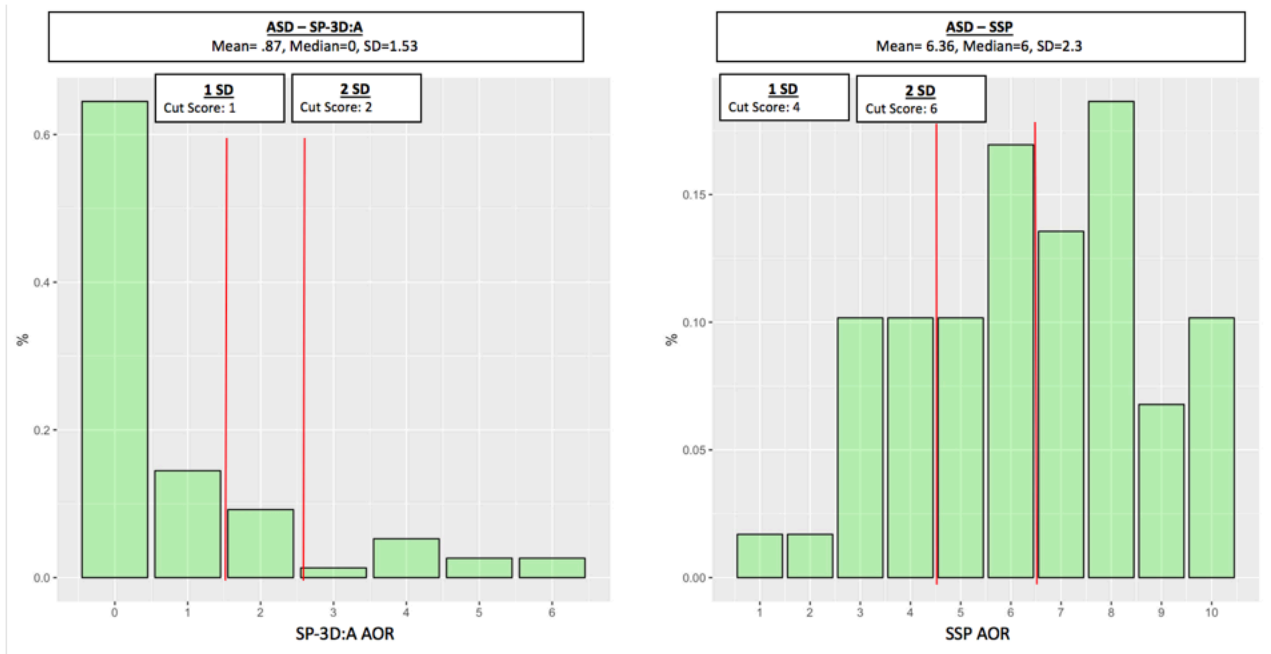

ASD= Autism Spectrum Disorder; SP-3D:A= Sensory Processing-3 Dimensions: Assessment, SD= Standard Deviation; AOR= Auditory Over-Responsivity; SSP= Short Sensory Profile

2b.

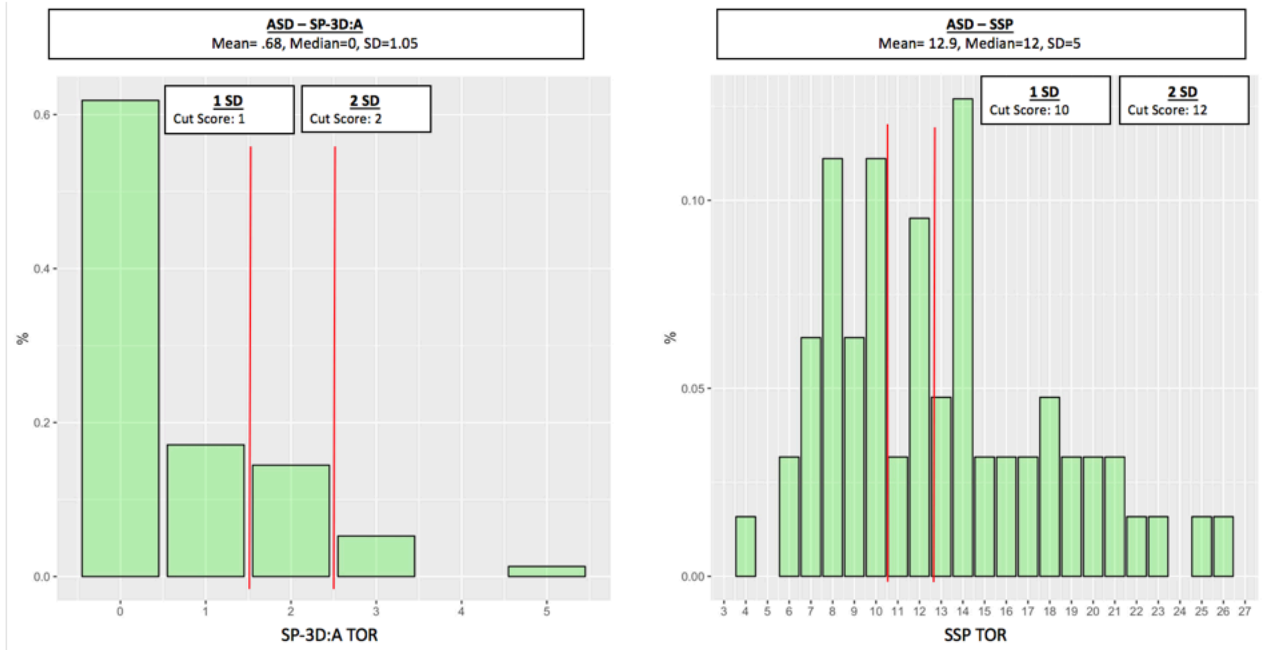

ASD= Autism Spectrum Disorder; SP-3D:A= Sensory Processing-3 Dimensions: Assessment, SD= Standard Deviation; TOR= Tactile Over-Responsivity; SSP= Short Sensory Profile
